# Supplementary material
Source: Springer Nature journal article supplement (https://www.springermedizin.de/resource/supplementary/12916_2009_211_MOESM1_ESM.pdf/9599402)

**Patients diagnosed  
with diabetes  
N=4404**

**Died  
N=24**

**Transferred out  
N=135**

**Lost to follow-up  
N=1508**

**Attended only 1  
consultation  
N=249**

**lost to follow up  $\leq 1$  year  
N=869**

**Lost to follow up  $> 1$  year  
N=390**

**Active on treatment  
N=2737**

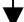

Supplement: MOESM1 [file 9599402]
